# Supplementary material for: Ternary Pt–Pd–Ag alloy nanoflowers for oxygen reduction reaction electrocatalysis
Source: Royal Society of Chemistry journal article supplement (doi:10.1039/c7ce01721a), 2017-01-01
Supplement: c7ce01721a1.pdf [file c7ce01721a1.pdf]

Electronic Supplementary Material (ESI) for CrystEngComm.  
This journal is © The Royal Society of Chemistry 2017

## Ternary Pt-Pd-Ag alloy nanoflowers for oxygen reduction reaction electrocatalysis

Aleksei Chalgin, Fenglei Shi, Fan Li, Qian Xiang, Wenlong Chen, Chengyi Song, Peng Tao, Wen Shang, Tao Deng,\* and Jianbo Wu\*

State Key Laboratory of Metal Matrix Composites, School of Materials Science and Engineering, Shanghai Jiao Tong University, 800 Dongchuan Rd, Shanghai, 200240, People's Republic of China.

Correspondence and requests for materials should be addressed to J. B. Wu and T. Deng

E-mail: [jianbowu@sjtu.edu.cn](mailto:jianbowu@sjtu.edu.cn); [dengtao@sjtu.edu.cn](mailto:dengtao@sjtu.edu.cn)

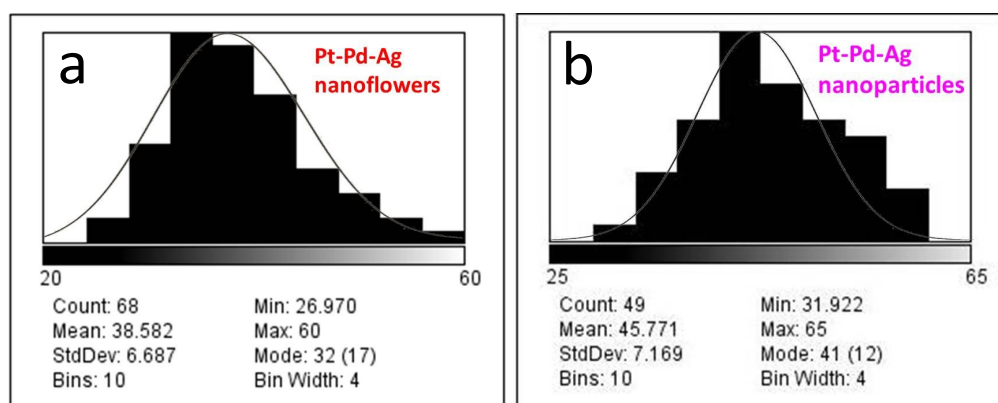

**Fig. S1** Particle size Gaussian normal distribution of (a) Pt-Pd-Ag alloy nanoflowers and (b) irregularly-shaped nanoparticles.

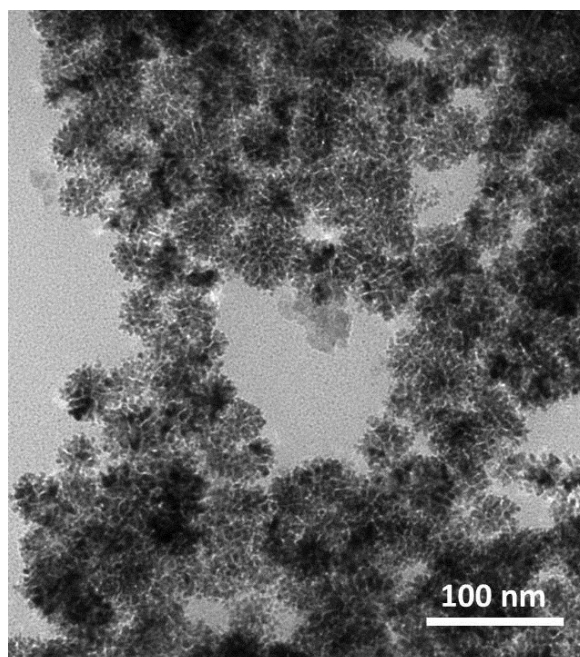

**Fig. S2** Low magnification TEM micrograph of Pt-Pd-Ag nanoflowers before heat treatment.

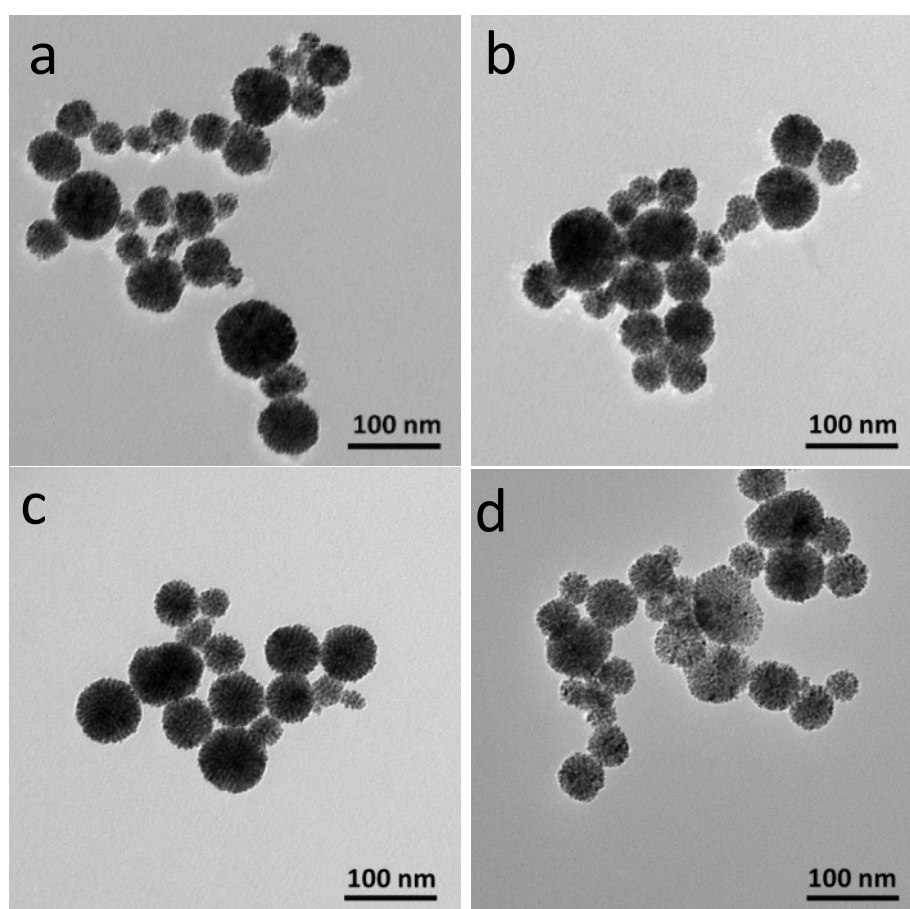

**Fig. S3** Low magnification TEM micrographs of time study. Duration of heating treatment at 95 °C:

(a) 15 min, (b) 30 min, (c) 1 hour, (d) 2 hours.

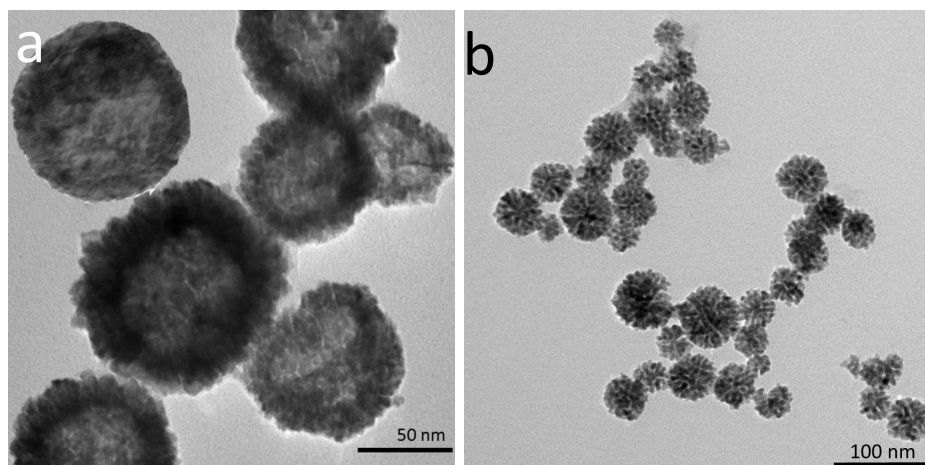

**Fig. S4** Low magnification TEM micrographs of bi-metallic nanostructures after heat treatment of 2 h at 95 °C prepared in absence of: (a) Pd-precursor  $\text{Na}_2\text{PdCl}_4$ , (b) Pt-precursor  $\text{K}_2\text{PtCl}_4$ .

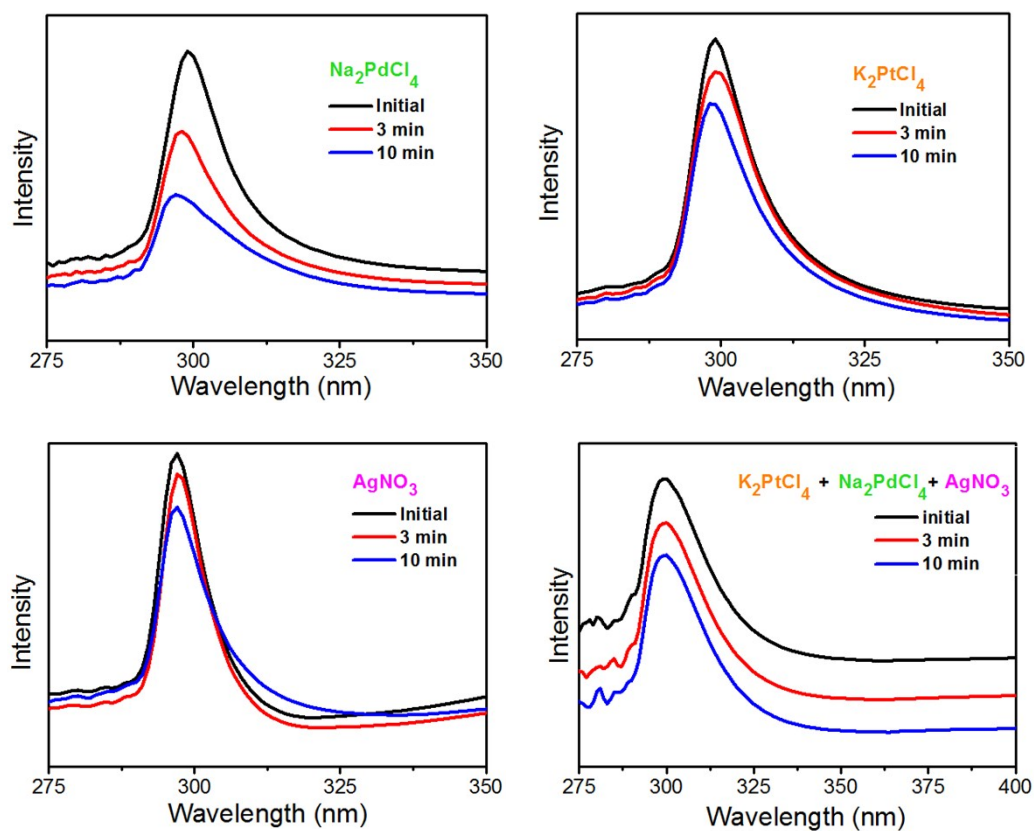

**Figure S5** Time-dependent UV-vis extinction spectra of the aqueous HMTA + CTAC + AA mixtures containing (a)  $\text{Na}_2\text{PdCl}_4$ , (b)  $\text{K}_2\text{PtCl}_4$ , (c)  $\text{AgNO}_3$ , and (d)  $\text{K}_2\text{PtCl}_4 + \text{Na}_2\text{PdCl}_4 + \text{AgNO}_3$ .

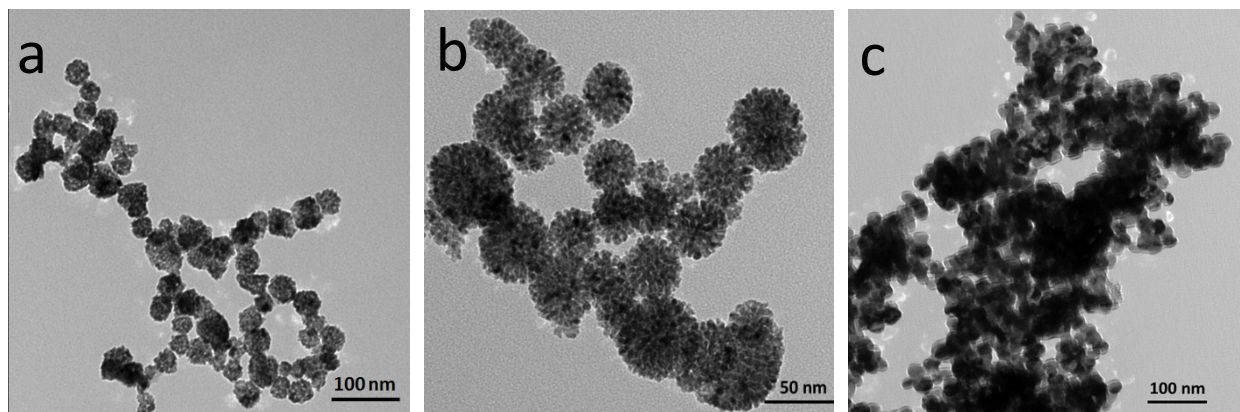

**Fig. S6** Low magnification TEM micrographs of Pt-Pd-Ag nanoflowers after heat treatment of 2 h at 95 °C prepared without: (a) HMTA, (b) CTAC, (c) AA.

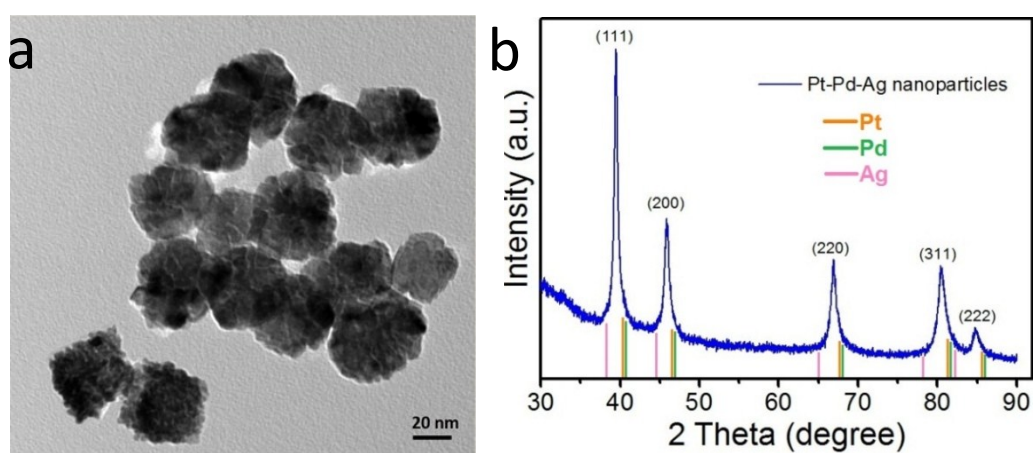

**Fig. S7** (a) Low magnification TEM micrograph of Pt-Pd-Ag nanoparticles with irregular shape and (b) Powder XRD pattern.

**Table S1** Comparison of the elemental ratios in the catalysts inks based on ICP-OES analysis of the Pt-Pd-Ag/C nanoflowers (NFs) and irregularly-shaped nanoparticles (NPs).

| Element                      | Morphology | Ag     | Pd     | Pt     |
|------------------------------|------------|--------|--------|--------|
| Unit                         |            | wt%    | wt%    | wt%    |
| Average Value                | NFs        | 28.88  | 25.94  | 45.18  |
|                              | NPs        | 32.77  | 18.96  | 48.27  |
| Standard Deviation           | NFs        | 0.36   | 0.17   | 0.47   |
|                              | NPs        | 0.35   | 0.13   | 0.52   |
| %Relative Standard Deviation | NFs        | 0.4246 | 0.2227 | 0.3527 |
|                              | NPs        | 0.3616 | 0.2478 | 0.3906 |
